# Supplementary material for: Particularly developed transition from the 5D1 level of Eu3+ and its significant contribution to the improved photocatalysis of (Bi3Li)O4Cl2via prolonging the decay time of the excited state
Source: Royal Society of Chemistry journal article supplement (doi:10.1039/d0tc03718d), 2020-01-01
Supplement: d0tc03718d1.pdf [file d0tc03718d1.pdf]

## Supporting information

### Particularly developed transition from $^5D_1$ level of $\text{Eu}^{3+}$ and its significant contribution to the improved photocatalysis of $(\text{Bi}_3\text{Li})\text{O}_4\text{Cl}_2$ via prolonging decay time of excited state

Donglei Wei,<sup>a</sup> Zutao Fan,<sup>a</sup> Yanlin Huang,<sup>b</sup> Hyo Jin Seo<sup>\*a</sup>

<sup>a</sup> Department of Physics, Pukyong National University, Busan 608-737, Republic of Korea

<sup>b</sup> College of Chemistry, Chemical Engineering and Materials Science, Soochow University, Suzhou 215123, China

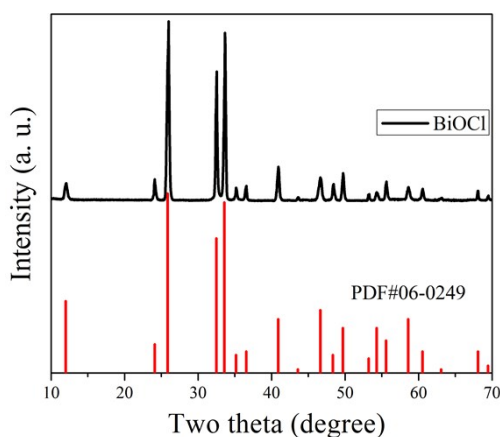

**Fig. S1** XRD pattern for the comparative sample of BiOCl compared with standard PDF# 06-0249.

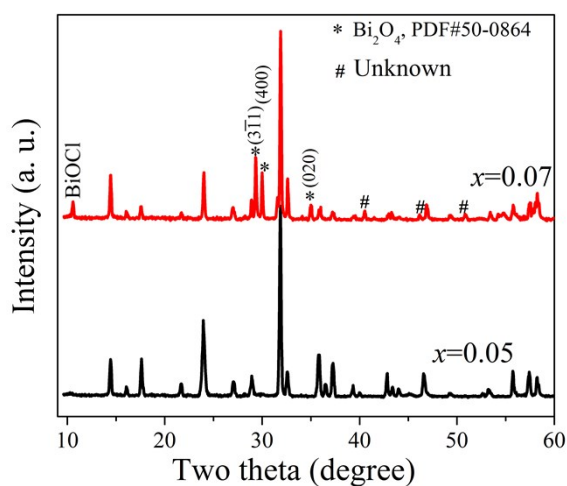

\* Corresponding authors: [hjseo@pknu.ac.kr](mailto:hjseo@pknu.ac.kr) (Hyo Jin Seo); Tel.: +82-51-629 5568; fax:+82-51-62955494.

**Fig. S2** XRD patterns of  $(\text{Bi}_{3-3x}\text{Eu}_{3x}\text{Li})\text{O}_4\text{Cl}_2$  with  $x=0.05$  and  $0.07$  indicating some impurity

phases appeared when  $x>0.05$ .

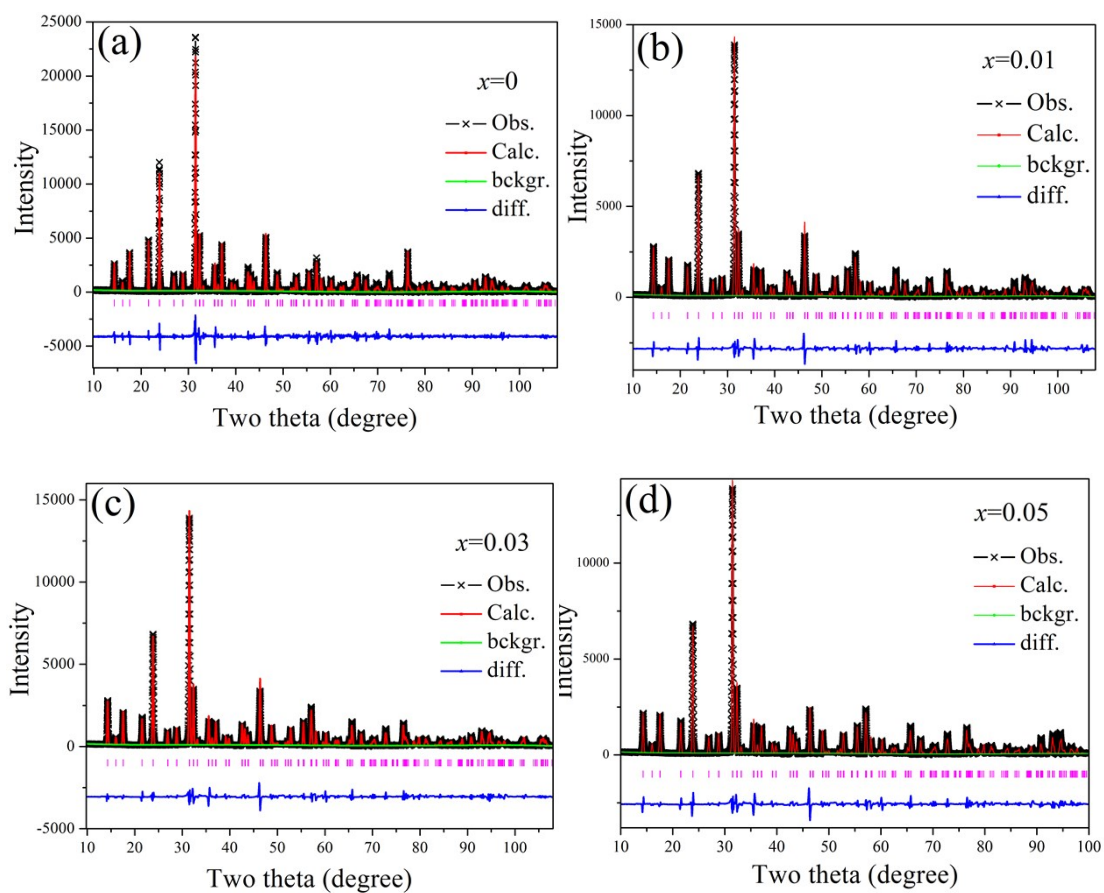

**Fig. S3** Representative Rietveld refinements of  $(\text{Bi}_{3-3x}\text{Eu}_{3x}\text{Li})\text{O}_4\text{Cl}_2$  with  $x=0$  (a),  $0.01$  (b),

$0.03$  (c) and  $0.05$  (d).

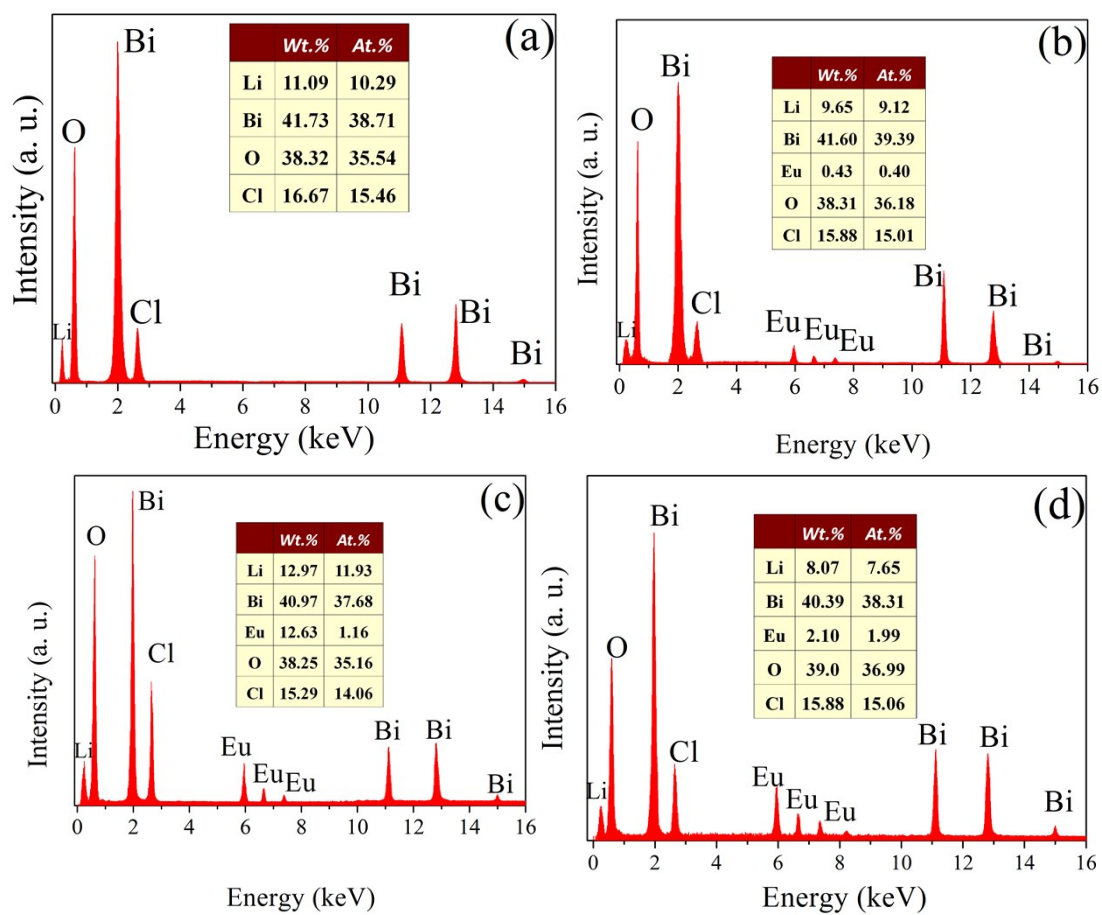

**Fig. S4** EDS patterns and the experimental element ratios of  $(\text{Bi}_{3-3x}\text{Eu}_{3x}\text{Li})\text{O}_4\text{Cl}_2$ ,  $x=0$  (a), 0.01 (b), 0.01 (c) and 0.05 (d).

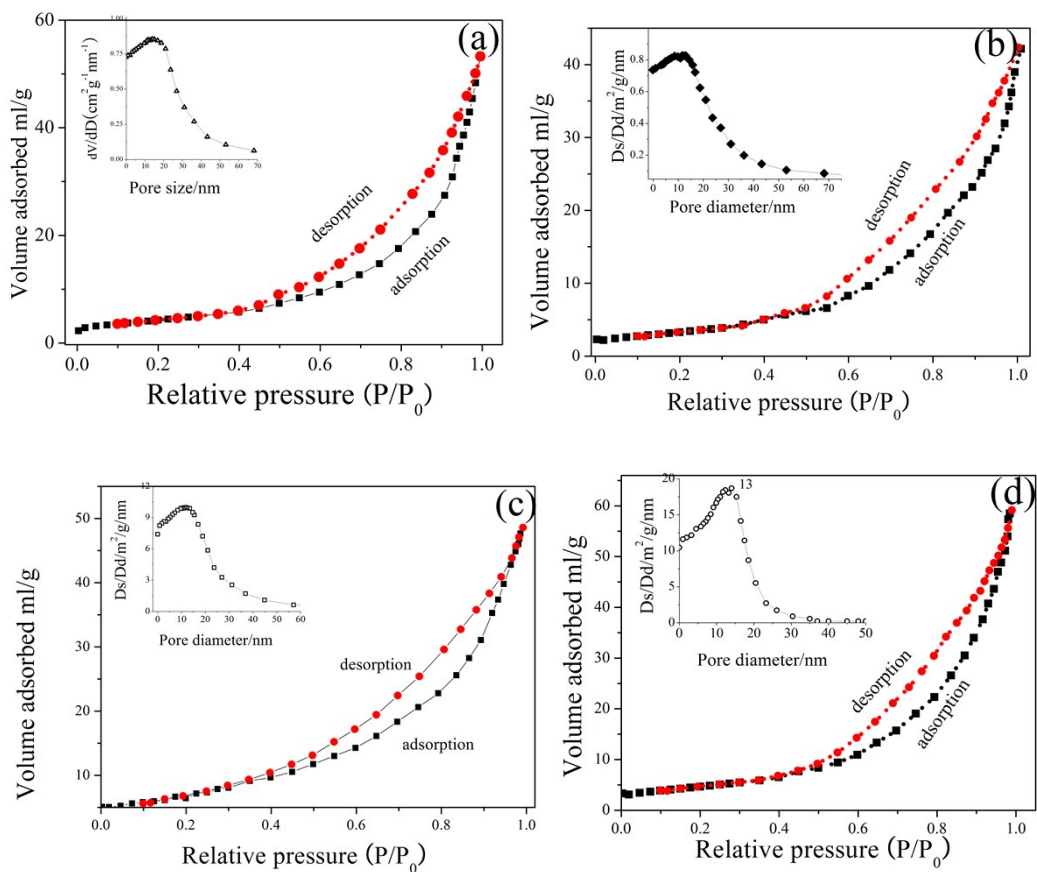

**Fig. S5**  $N_2$  sorption isotherms for  $(Bi_{3-3x}Eu_{3x}Li)O_4Cl_2$  with  $x=0$  (a), 0.01 (b), 0.03 (c) and 0.05 (d). The insets of the figures show BJH-desorption pore-sizes.

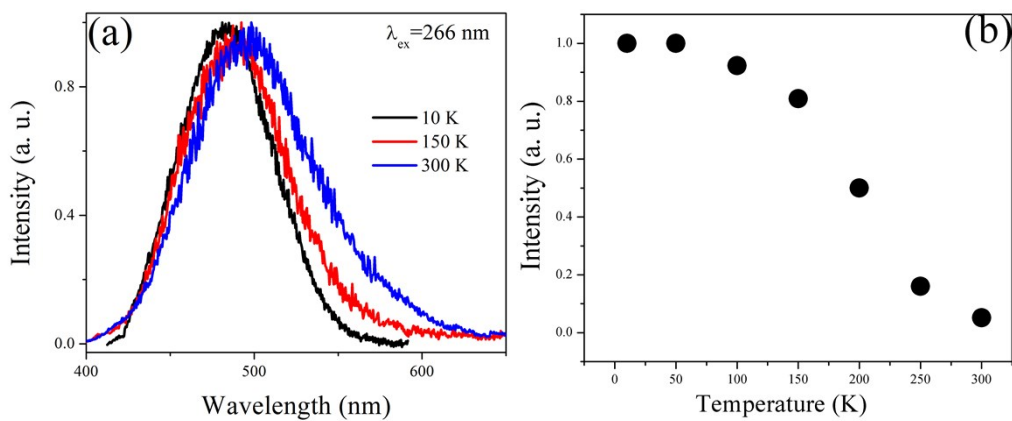

**Fig. S6** the normalized representative emission spectra at 10, 150, and 300 K (a) and the temperature dependent intensity (b) of  $(\text{Bi}_3\text{Li})\text{O}_4\text{Cl}_2$  ( $\lambda_{\text{ex}}=266$  nm).

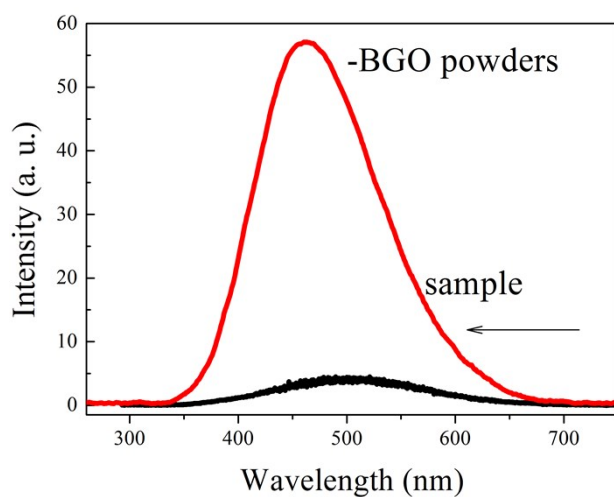

**Fig. S7** the comparison of XEL spectra at 300 K between  $(\text{Bi}_3\text{Li})\text{O}_4\text{Cl}_2$  and BGO powders.

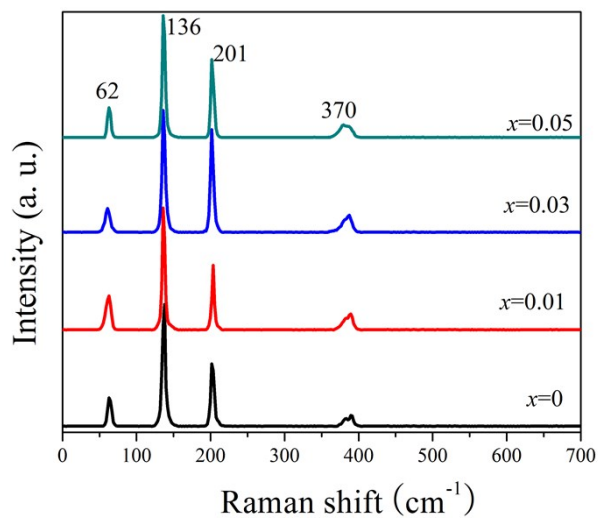

**Fig. S8** the Raman spectra of  $(\text{Bi}_{3-3x}\text{Eu}_{3x}\text{Li})\text{O}_4\text{Cl}_2$  ( $x=0, 0.01, 0.03, 0.05$ ).

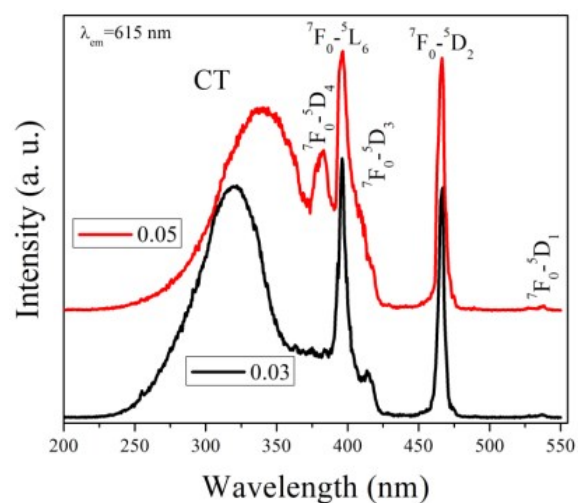

**Fig. S9** the normalized values of  $(\text{Bi}_{3-3x}\text{Eu}_{3x}\text{Li})\text{O}_4\text{Cl}_2$  ( $x=0.03, 0.05$ ) ( $\lambda_{\text{em}}=615$  nm).

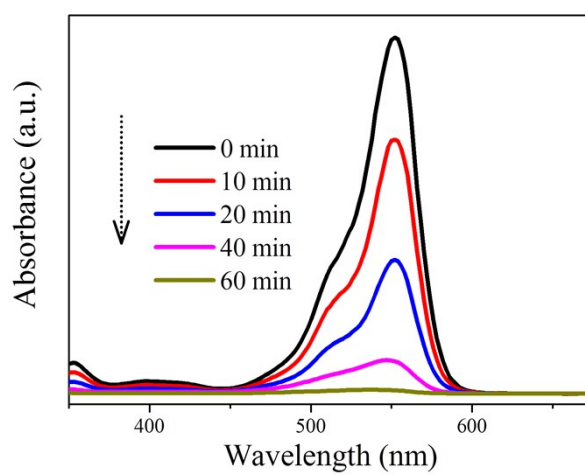

**Fig. S10** the typical optical absorption of RhB solutions after photodegradation by  $(\text{Bi}_{3-3x}\text{Eu}_{3x}\text{Li})\text{O}_4\text{Cl}_2$  ( $x=0.05$ ).

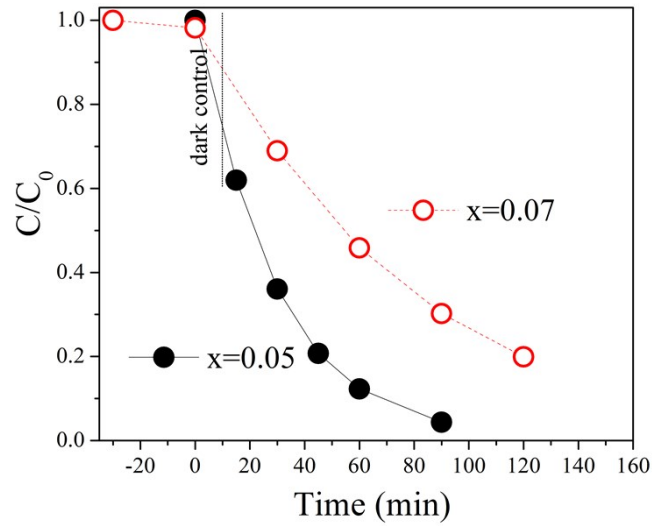

Fig. S11 photo-degradation effects of  $(\text{Bi}_{3-3x}\text{Eu}_{3x}\text{Li})\text{O}_4\text{Cl}_2$  compared between  $x=0.05$  and  $0.07$ .

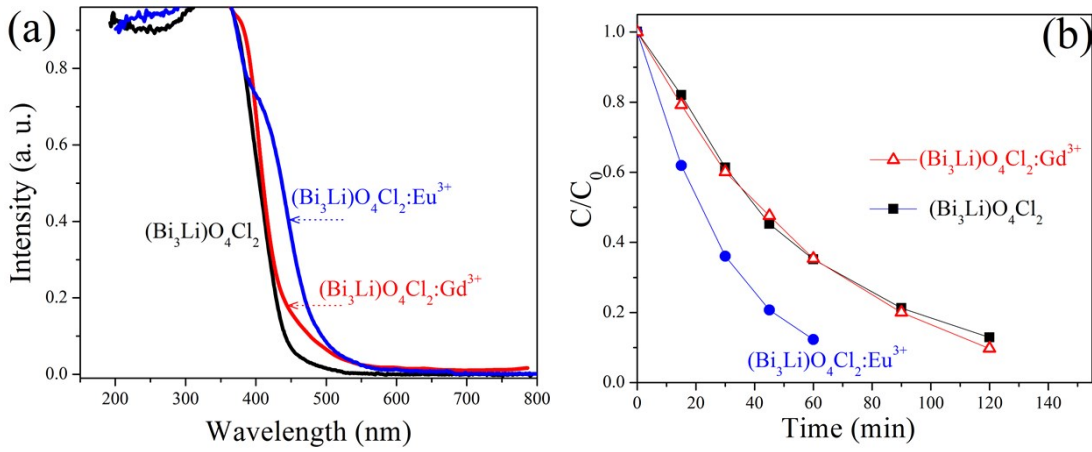

Fig. S12 the comparison of absorption (a) and photodegradation (b) of  $(\text{Bi}_{3-3x}\text{Eu}_{3x}\text{Li})\text{O}_4\text{Cl}_2$  ( $x=0, 0.05$ ) and  $(\text{Bi}_{3-3x}\text{Gd}_{3x}\text{Li})\text{O}_4\text{Cl}_2$  ( $x=0.05$ ).
